# Supplementary material for: FEN1 -69G>A and 4150G>T polymorphisms and cancer risk in Chinese population
Source: PubMed Central journal article supplement — Sci Rep. 2014 Aug 26;4:6183. doi: 10.1038/srep06183 (PMC4143769; doi:10.1038/srep06183), 2014-08-26
Supplement: srep06183-s1.pdf [file srep06183-s1.pdf]

***FEN1* -96G>A and 4150G>T polymorphisms and cancer risk in Chinese population**

Xueren Gao, Shulong Zhang, Yongfeng Yang, Guorong Han

Supplement Table S1 Frequency distribution of the *FEN1* -69G>A and 4150G>T haplotypes

| First author | Case                               |                                    |                                    |                                    | Control                            |                                    |                                    |                                    |
|--------------|------------------------------------|------------------------------------|------------------------------------|------------------------------------|------------------------------------|------------------------------------|------------------------------------|------------------------------------|
|              | A <sub>-69</sub> T <sub>4150</sub> | G <sub>-69</sub> G <sub>4150</sub> | A <sub>-69</sub> G <sub>4150</sub> | G <sub>-69</sub> T <sub>4150</sub> | A <sub>-69</sub> T <sub>4150</sub> | G <sub>-69</sub> G <sub>4150</sub> | A <sub>-69</sub> G <sub>4150</sub> | G <sub>-69</sub> T <sub>4150</sub> |
| Lv, Z.       | 46                                 | 119                                | 616                                | 1419                               | 11                                 | 17                                 | 1075                               | 1697                               |
| Chen, Y. D.  | 243                                | 286                                | 1                                  | 4                                  | 478                                | 1110                               | 8                                  | 8                                  |
| Liu, L.      | 1183                               | 54                                 | 1317                               | 1082                               | 1736                               | 43                                 | 1536                               | 1126                               |
| Yang, M.     | 1251                               | 2893                               | 50                                 | 105                                | 1558                               | 2287                               | 30                                 | 41                                 |

Supplement Table S2 Main Characteristics of *FEN1* -69G>A polymorphism and *FEN1* mRNA expression

| First author | Tissue type      | Assay method                            | Internal reference | Sample number | Genotype | <i>FEN1</i> mRNA expression (mean $\pm$ SE) | SD     |
|--------------|------------------|-----------------------------------------|--------------------|---------------|----------|---------------------------------------------|--------|
| Liu, L.      | Liver            | SYBR-Green<br>real-time quantity<br>PCR | $\beta$ -actin     | 5             | AA       | 0.217 $\pm$ 0.038                           | 0.0850 |
|              |                  |                                         |                    | 15            | AG+GG    | 0.099 $\pm$ 0.013                           | 0.0503 |
|              | Esophagus        |                                         |                    | 4             | AA       | 0.242 $\pm$ 0.015                           | 0.0300 |
|              |                  |                                         |                    | 11            | AG+GG    | 0.108 $\pm$ 0.042                           | 0.1393 |
|              | Stomach          |                                         |                    | 3             | AA       | 0.268 $\pm$ 0.060                           | 0.1039 |
|              |                  |                                         |                    | 9             | AG+GG    | 0.120 $\pm$ 0.035                           | 0.1050 |
|              | Colon and rectum |                                         |                    | 3             | AA       | 0.198 $\pm$ 0.034                           | 0.0589 |
|              |                  |                                         |                    | 10            | AG+GG    | 0.091 $\pm$ 0.012                           | 0.0379 |
| Lv, Z.       | Breast           | SYBR-Green<br>real-time quantity<br>PCR | $\beta$ -actin     | 6             | AA       | 0.193 $\pm$ 0.027                           | 0.0661 |
|              |                  |                                         |                    | 19            | AG+GG    | 0.084 $\pm$ 0.010                           | 0.0436 |
